# Supplementary material
Source: Research Square preprint supplement (doi:10.21203/rs.3.rs-9596403/v1)
Supplement: Supplementary file 1 [file 6c7536fda590f262ad1aa705.docx]

| Supplementary Table 1: Method of Diagnostic Confirmation | | | | | | |
| --- | --- | --- | --- | --- | --- | --- |
| Arterial Phase | Washout | Diagnoses | Pathology | Imaging | Concordant | Total |
| Non-Rim APHE | Rapid, Weak | HCC | 4 | 11 | 15 | 30 |
|  | ICC | 0 | 0 | 4 | 4 |
|  | Metastases | 0 | 1 | 1 | 2 |
|  | Adenocarcinoma | 1 | 0 | 0 | 1 |
|  | Benign Parenchyma | 2 | 0 | 0 | 2 |
|  | Unspecified LR-M | 0 | 1 | 0 | 1 |
| Rapid, Marked | HCC | 1 | 2 | 1 | 4 |
|  | ICC | 1 | 0 | 4 | 5 |
|  | Mixed HCC/ICC | 1 | 0 | 0 | 1 |
|  | Metastases | 1 | 3 | 0 | 4 |
|  | Adenocarcinoma | 1 | 0 | 0 | 1 |
|  | LR-3 | 0 | 1 | 0 | 1 |
|  | FNH | 0 | 0 | 1 | 1 |
|  | Abscess | 0 | 0 | 1 | 1 |
| Late, Weak | Adenoma | 0 | 0 | 1 | 1 |
| Late, Marked | - | - | - | - | - |
| Non-Rim APE | Rapid, Weak | HCC | 0 | 1 | 0 | 1 |
|  | RN | 1 | 0 | 0 | 1 |
|  | n/a | 2 | 0 | 0 | 2 |
| Rapid, Marked | ICC | 0 | 1 | 0 | 1 |
|  | Metastases | 0 | 1 | 0 | 1 |
| Late, Weak | - | - | - | - | - |
| Late, Marked | - | - | - | - | - |
| Rim APHE | Rapid, Weak | HCC | 2 | 2 | 3 | 7 |
|  | Biliary Lesion | 0 | 0 | 1 | 1 |
|  | Metastases | 0 | 1 | 0 | 1 |
|  | LR-3 | 0 | 1 | 0 | 1 |
|  | Fibrosis + Inflammation | 1 | 0 | 0 | 1 |
|  | Unspecified LR-M | 0 | 1 | 0 | 1 |
| Rapid, Marked | HCC | 1 | 2 | 0 | 3 |
|  | ICC | 1 | 1 | 3 | 5 |
|  | Metastases | 0 | 3 | 2 | 5 |
|  | Hemangioma | 0 | 1 | 0 | 1 |
| Late, Weak | HCC | 0 | 1 | 3 | 4 |
|  | ICC | 1 | 2 | 0 | 3 |
| Late, Marked | FNH | 0 | 1 | 0 | 1 |
|  | Unspecified LR-M | 0 | 1 | 0 | 1 |
